# Supplementary material
Source: publisher site journal article supplement (https://www.dovepress.com/article/400061)
Supplement: Supplementary file 1 [file get_supplementary_file.php]

**Appendix 1: Final health states**

WHO - Functional class 2

- You have been diagnosed with a life-long condition which affects your heart and your lungs. You are under the care of a physician and require regular monitoring and medication to manage your condition.
- You do not experience any problems breathing when doing light physical activity, such as walking short distances around your house or climbing stairs. You become breathless if you do activities such as walking uphill or carrying shopping and you will need to rest for a few minutes when this happens. You do not feel light-headed if you over exert yourself.
- You occasionally experience chest tightness.
- You do not have swelling in your legs or abdomen.
- You often experience mild fatigue and sometimes lack energy to do activities.
- You are able to wash and dress yourself. You are able to do your daily activities such as work, household chores, and cooking, providing you do not exert yourself too much.
- You are able to visit family and friends.
- You are unable to do strenuous exercise or play competitive sports. You are able to do light exercise like walking, cycling or climbing.
- You feel anxious about your condition and the restrictions that it places on your life.

WHO- Functional class 3

- You have been diagnosed with a life-long condition which affects your heart and your lungs. You are under the care of a physician and require regular monitoring and medication to manage your condition.
- You experience moderate breathlessness when doing light physical activity, such as walking short distances around your house. You must rest in between steps when climbing the stairs. You may find activities involving moderate exertion, such as walking uphill or carrying shopping difficult or unable to do. You will need to rest for a few minutes after you do an activity. You will feel light-headed if you over exert yourself.
- You sometimes experience chest palpitations and mild chest pain on exertion.
- You sometimes have swelling in your legs and abdomen which can be controlled with medication.
- You occasionally experience moderate fatigue and lack energy to do activities.
- You are able to wash and dress yourself but need some assistance to get in and out of the bath and to put socks and shoes on. You are able to do some daily activities such as full-time work, strenuous household chores, and cooking but you need more time and breaks. You are able to do light activities with assistance.
- You are limited in your ability to visit family and friends because you become tired easily.
- You are unable to do strenuous exercise or play competitive sports. You are able to do light exercise like walking only.
- You feel anxious and depressed about your condition and are sad you are unable to do the activities you used to do. You worry about the future.

WHO- Functional class 4

- You have been diagnosed with a life-long condition which affects your heart and your lungs. You are under the care of a physician and require regular monitoring and medication to manage your condition.
- You experience severe breathlessness when doing very minimal physical activity, such as walking around the room, and also at rest. You are unable to climb stairs. You are unable to carry anything. You will need to rest most of the time. You experience frequent dizziness and light-headedness and will have black outs if you do not rest when you feel breathless.
- You experience frequent chest palpitations and moderate chest pain on exertion.
- You frequently have swelling in your legs and abdomen which can be controlled with medication.
- You experience severe fatigue and constantly lack energy to do activities.
- You need assistance to wash and dress yourself. You are unable to do your daily activities such as work or any household tasks.
- You are very limited in your ability to visit family and friends because you become tired easily.
- You are unable to do exercise or play sports.
- You feel very anxious and depressed about your condition worsening in the future. You are sad you are unable to do the activities you used to do and feel isolated.

PH-related Hospitalisation

- You have been diagnosed with a life-long condition which affects your heart and your lungs. You are under the care of a physician and require regular monitoring and medication to manage your condition.
- You experience severe breathlessness when doing very minimal physical activity, such as walking around the room, and also at rest. You are unable to climb stairs. You are unable to carry anything. You will need to rest most of the time. You experience frequent dizziness and light-headedness and will have black outs if you do not rest when you feel breathless.
- You have been admitted to hospital as your symptoms are getting worse, such as, worsening of swelling, breathing or a chest infection. You have to stay in hospital for 5-7 days. In hospital, you are given treatment to manage your symptoms and you are closely monitored. You have not been walking as much as usual and therefore feel weaker than normal.
- You experience frequent chest palpitations and moderate chest pain on exertion.
- You experience severe fatigue and constantly lack energy to do activities.
- You are unable to wash and dress yourself while you are in hospital. Once you leave the hospital and go home you will need some assistance to wash and dress yourself until you have regained your strength. You are unable to do your daily activities while you are in hospital.
- Your family and friends are able to visit you in hospital.
- You are unable to do exercise or play sports.
- You feel very anxious and depressed about your condition and are worried it may be getting worse. You are sad you are unable to do the activities you used to do. You feel lonely and bored while you are in hospital.

PEA surgery and recovery

- You have been diagnosed with a life-long condition which affects your heart and your lungs. You are under the care of a physician and require regular monitoring and medication to manage your condition.
- You undergo major chest surgery under general anaesthetic which can last up to 10 hours. Normally, most of the blockages from your lungs will be removed. You need to stay in hospital for two to three weeks to have the operation and recover. You feel soreness in your chest after the surgery. You have not been walking as much as usual and therefore feel weaker than normal.
- After the surgery you experience an instant improvement in breathlessness when doing light physical activity. Once you have fully recovered from the operation you do not experience any breathlessness after doing light activity. Soon after the operation you can walk short distances around the ward. You are able to climb a few steps slowly. You will need to rest for a few minutes when you do any activity while you are in hospital recovering from the surgery.
- You experience moderate fatigue while you are regaining your strength after the surgery.
- You have become weaker from spending a few weeks in hospital, so you need assistance to wash and dress yourself until you have regained your strength, as well as to allow the chest scar to heal.
- You are unable to do your daily activities while you are in hospital. When you go home after surgery, you have difficulty doing activities as you feel weakened from your surgery. You are not able to drive for six weeks after surgery. You are not able to carry weight for three months after surgery. It will take approximately six months for you to recover completely from surgery and be able to do your activities again as normal.
- Your family and friends are able to visit you in hospital.
- You are unable to do strenuous exercise or play sports while recovering. Once you have recovered you are able to do exercise and play sports.
- You feel anxious and depressed about your condition and are worried about the surgery. After surgery, you feel hopeful that you are feeling better and your condition is improving.

BPA procedure and recovery

- You have been diagnosed with a life-long condition which affects your heart and your lungs. You are under the care of a physician and require regular monitoring and medication to manage your condition.
- You undergo a procedure under local anaesthetic which involves catheters being inserted into your lungs to open the blockages. You need to stay in hospital overnight to have the procedure which lasts a few hours. You will need to repeat the procedure three to four times with approximately one month of recovery time in between. You experience some soreness in your sides and groin area after the procedure.
- You experience some improvement in breathlessness when doing light physical activity after each procedure and further improvement with each additional procedure. Soon after the procedure, you can walk short distances around the ward. You are able to climb a flight of stairs. You will need to rest for a few days at home after each procedure.
- You experience some fatigue while you are regaining your strength after the procedure.
- You are able to wash and dress yourself and do these activities independently once you have recovered.
- You are unable to do your daily activities on the day you are in hospital. When you go home after the procedure, you must rest and avoid doing activities for a few days. You require three months to fully recover following the final procedure, after which time you are able to do your daily activities as normal.
- You are able to visit family and friends once you have recovered from the procedure.
- You are unable to do strenuous exercise or play sports whilst recovering. Once you have recovered you are able to do exercise and play sports.
- You feel anxious and depressed about your condition and are worried about the procedure. After each procedure, you feel hopeful that you are feeling better and your condition is improving.

**Appendix 2: Sociodemographic and clinical background of the qualitative interview patients (N=6)**

| Participant characteristics | | Sample  (N=6) |
| --- | --- | --- |
| Age: Mean (SD)  Range | | 37 (13.0)  22-55 |
| Gender Male N (%) | | 2 (33.3) |
| Diagnosis  N (%) | PAH | 2 (33.3) |
| CTEPH | 3 (50.0) |
| CTEPH with secondary diagnosis of PAH | 1 (16.6) |
| Main Occupation  N (%) | Self employed | 1 (16.6) |
| Seeking work/unemployed | 1 (16.6) |
| Long-term sick leave | 3 (50.0) |
| Student | 1 (16.6) |
| Education  N (%) | GCSE/O’Levels | 1 (16.6) |
| A Levels | 2 (33.3) |
| University degree | 2 (33.3) |
| Vocational qualification | 1 (16.6) |
| Date of diagnosis: Range | | 2001-2019 |
| Procedures  N (%) | PEA | 1 (16.6) |
| BPA | 2 (33.3) |
| WHO class  N (%) | FC I | 1 (16.6) |
| FC II | 2 (33.3) |
| FC III | 2 (33.3) |
| FC IV | 1 (16.6) |
